# Supplementary material for: Immunological Roles of TmToll-2 in Response to Escherichia coli Systemic Infection in Tenebrio molitor
Source: MDPI journal article supplement (doi:10.3390/ijms232214490), 2022-11-21
Supplement: s1 [file s1]

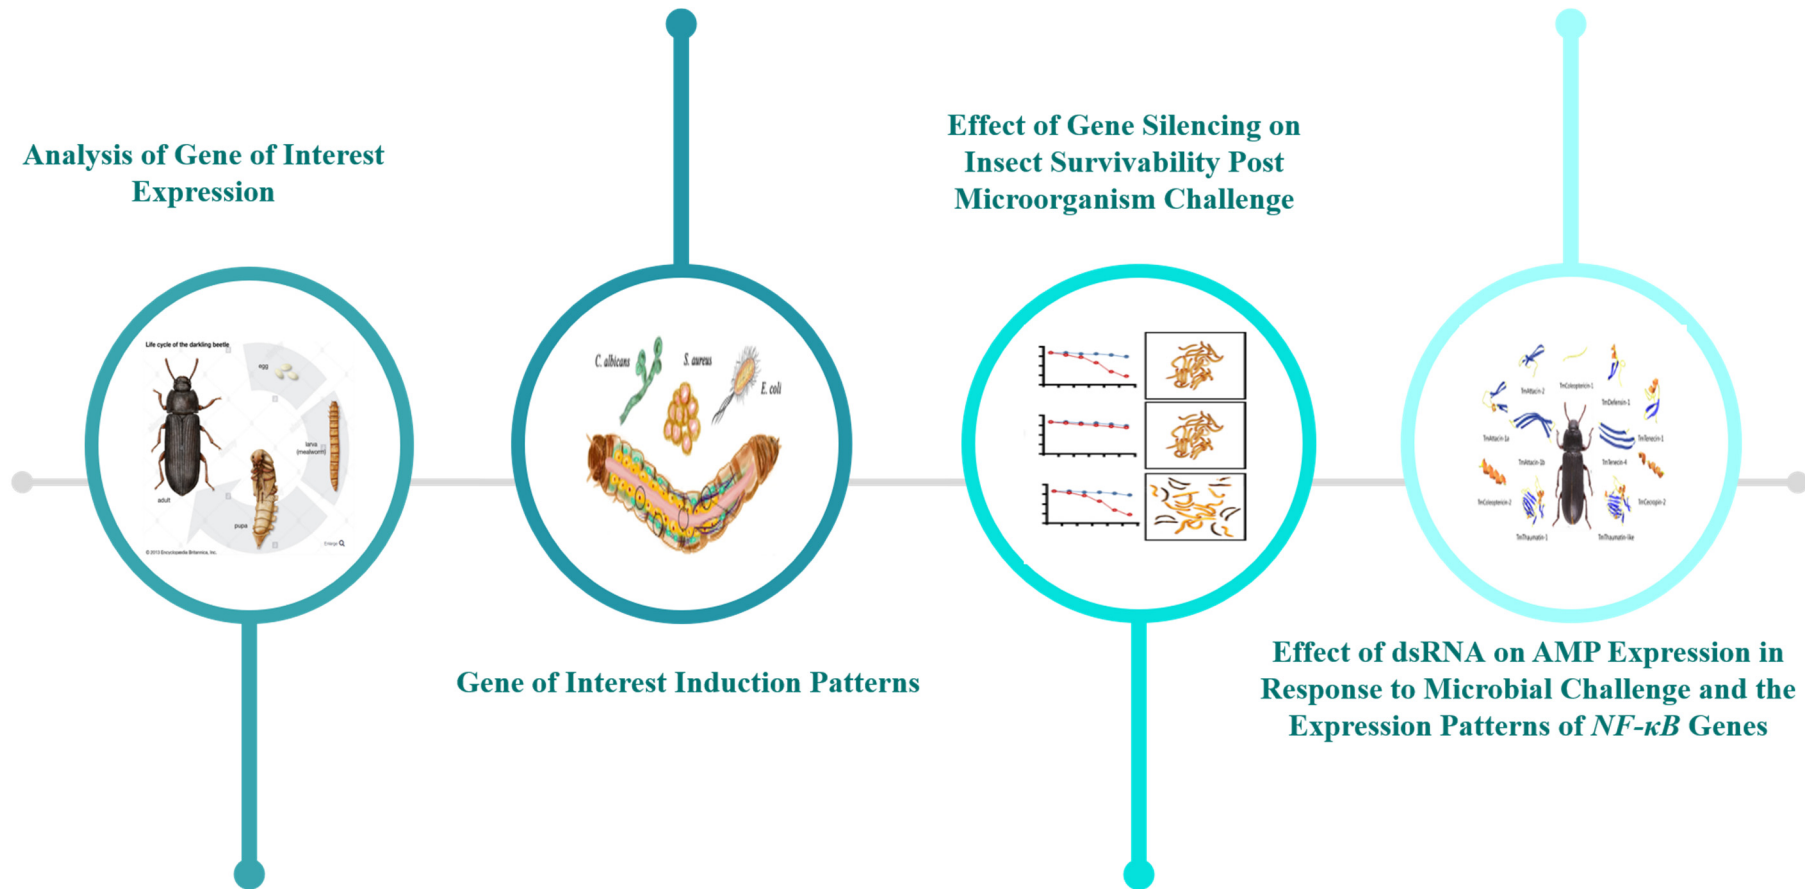

**Figure S1. Schematic illustration of experimental procedure.**

Following investigating the spatial and temporal expression of the *TmToll-2*, induction of mRNA expression of the gene has been analyzed. Further, innate immune response in *Tenebrio molitor* larvae has been studied after *TmToll-2* gene silencing by checking the AMP and *NF-κB* genes expression.
